# Supplementary material
Source: HighWire-hosted journal article supplement (https://www.cmajopen.ca/highwire/filestream/81282/field_highwire_adjunct_files/7/2018-0173-4-at.pdf)

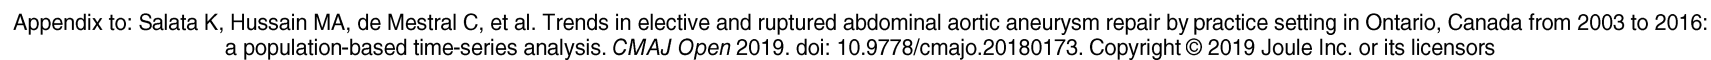

Supplement: 2018-0173-4-at.pdf [file 2018-0173-4-at.pdf]
